# Supplementary material for: Efficient difunctional photocatalyst prepared in situ from Prussian blue analogues for catalytic water oxidation and visible-light absorption
Source: Royal Society of Chemistry journal article supplement (doi:10.1039/c8cy01620h), 2018-01-01
Supplement: c8cy01620h1.pdf [file c8cy01620h1.pdf]

## Electrical Supporting information

# An efficient difunctional photocatalyst prepared in situ from Prussian blue analogues for catalytic water oxidation and visible light absorption

*Jia Guo<sup>a</sup>, Hui Li<sup>a</sup>, Di Wang<sup>a</sup>, Liugen Zhang<sup>a</sup>, Yuhua Ma<sup>a</sup>, Naeem Akram<sup>a</sup>, Yi Zhang<sup>b</sup>, Jide Wang<sup>a,\*</sup>*

<sup>a</sup> Key Laboratory of Oil and Gas Fine Chemicals, Ministry of Education & Xinjiang Uygur Autonomous Region, College of Chemistry and Chemical Engineering of Xinjiang University, Urumqi, 830046, China

<sup>b</sup> Hunan Provincial Key Laboratory of Efficient and Clean Utilization of Manganese Resources, College of Chemistry and Chemical Engineering, Central South University, Changsha 410083, Hunan, China

\* Corresponding author. *E-mail:* awangjd@sina.cn

## Synthesis of CuO and Co(OH)<sub>2</sub>

The synthesis of CuO was according to the reported literature.[34] 1.20 g of Cu(CH<sub>3</sub>COO)<sub>2</sub>·H<sub>2</sub>O was dissolved in 300 mL of distilled water in a round-bottomed flask equipped with a refluxing device. 1.00 mL glacial acetic acid was added by providing continuous magnetic stirring; a blue solution was appeared. This blue solution was then heated to 40 °C, 0.80 g of NaOH (s) was quickly added into the solution and then again heated to 100 °C for 30 min, where a large amount of brownish black precipitate was produced. After cooling it to the room temperature, the precipitate was centrifuged, washed once with distilled water and dried in a vacuum oven at 80°C during whole night. The method of synthesis Co(OH)<sub>2</sub> was similar to CuO expect that the reaction time was 1 h.

## Characterization

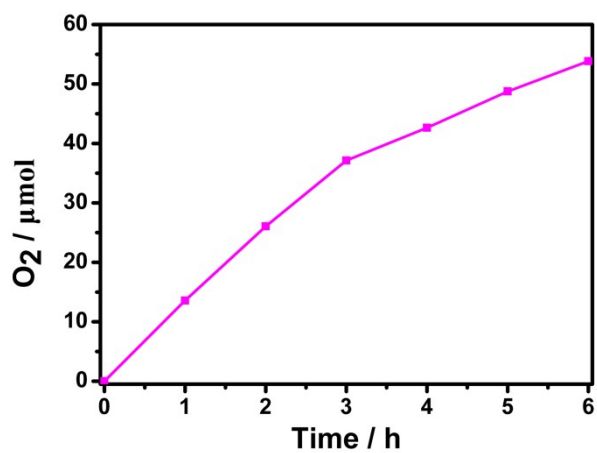

**Fig. S1** Kinetics of O<sub>2</sub> evolution of the chemical system using CuO as catalyst. Reaction condition: NaOH solution: 0.10 M, 10 mL; CuO: 5 mg; Na<sub>2</sub>S<sub>2</sub>O<sub>8</sub>: 20 mM; vigorous stirring at RT.

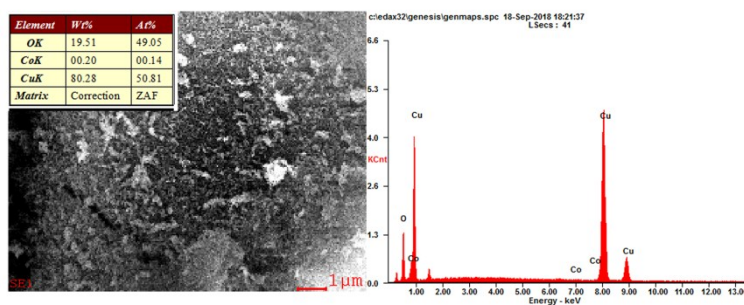

**Fig. S2** EDS of catalyst 1.

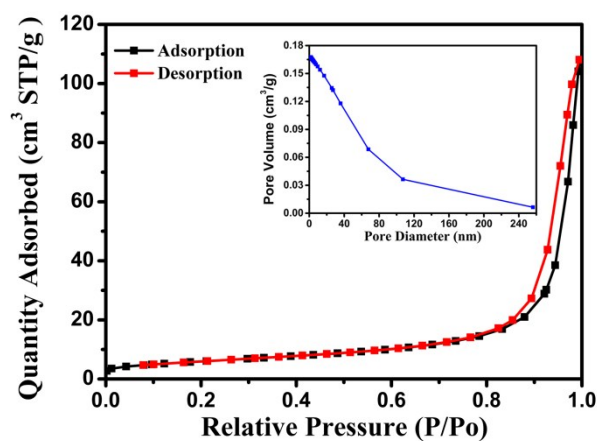

**Fig. S3** Nitrogen adsorption-desorption isotherms and the corresponding pore size distribution curve (inset) of catalyst 1

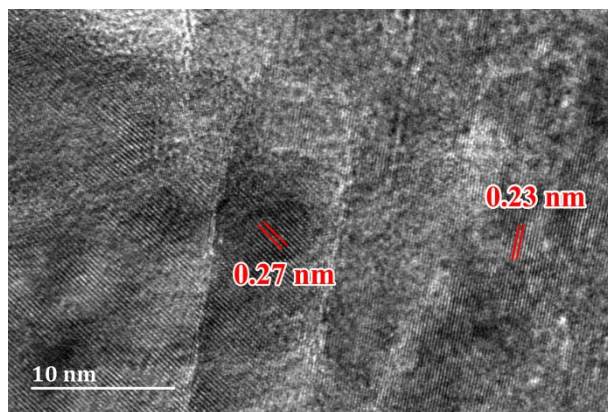

Fig. S4 High-resolution TEM images of catalyst 1.

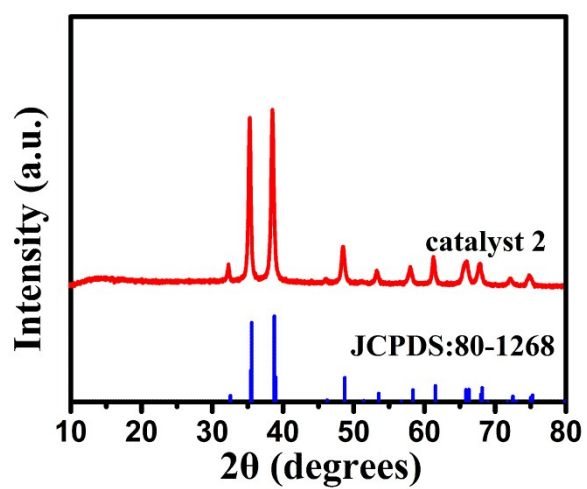

Fig. S5 XRD pattern of catalyst 2

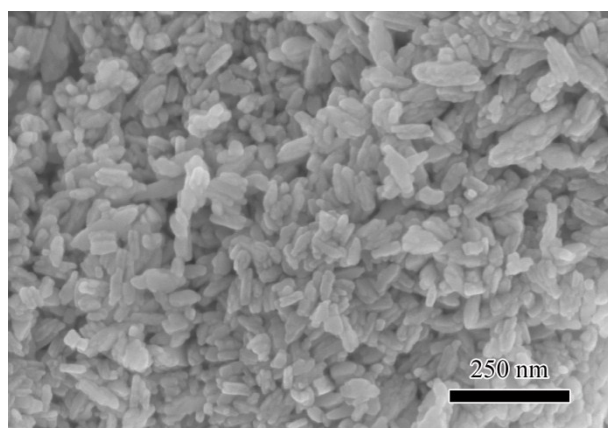

Fig. S6 FESEM image of catalyst 2

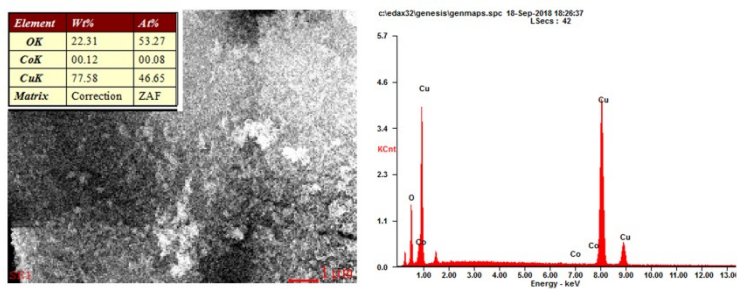

Fig. S7 EDS of catalyst 2.

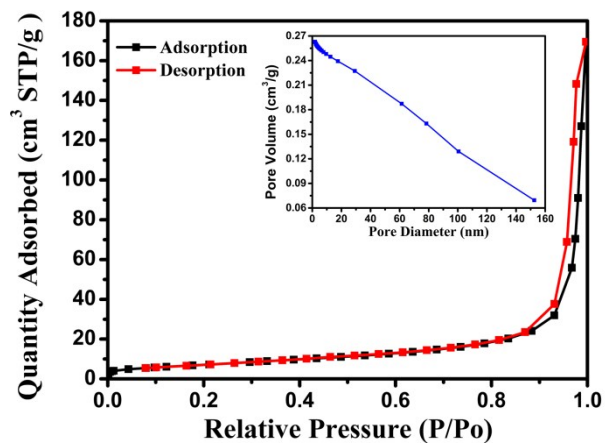

Fig. S8 Nitrogen adsorption-desorption isotherms and the corresponding pore size distribution curve (inset) of catalyst 2.

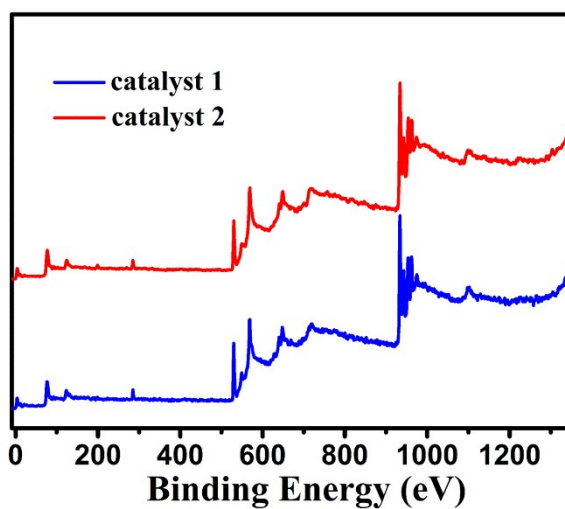

Fig. S9 XPS of catalyst 1 and 2 in the energy regions.

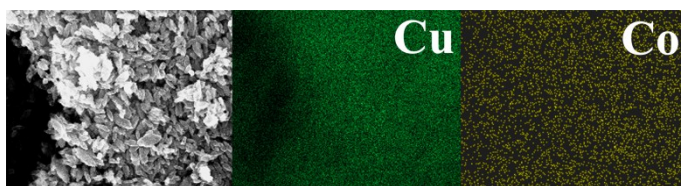

**Fig. 10** FESEM mapping images of catalyst 2.

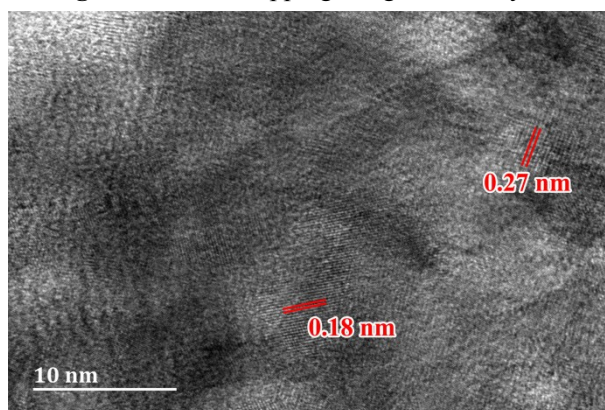

**Fig. S11** High-resolution TEM images of catalyst 2.

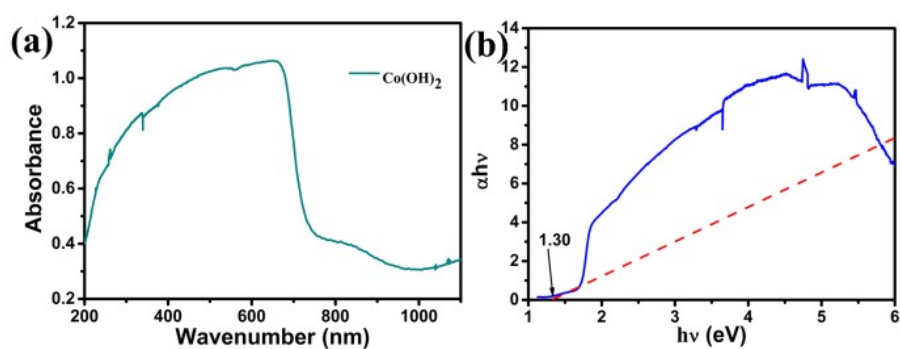

**Fig. S12** (a) UV-vis absorption spectra of  $\text{Co(OH)}_2$ . (b)  $(\alpha h\nu)^r$  versus  $h\nu$  curve of  $\text{Co(OH)}_2$ .

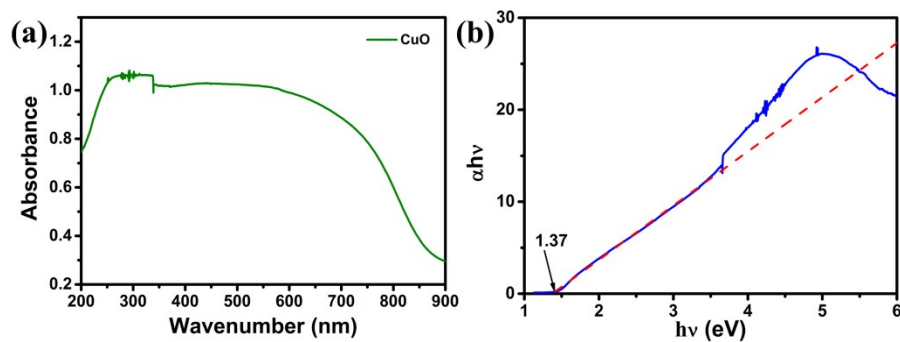

**Fig. S13** (a) UV-vis absorption spectra of  $\text{CuO}$ . (b)  $(\alpha h\nu)^r$  versus  $h\nu$  curve of  $\text{CuO}$ .

Table S1 data of samples.

| sample     | Cu (ppm) | Co (ppm) | $n_{\text{Cu}} : n_{\text{Co}}$ | loading weight<br>(mg/mg catalyst) | $S_{\text{BET}}$ ( $\text{m}^2 \cdot \text{g}^{-1}$ ) |
|------------|----------|----------|---------------------------------|------------------------------------|-------------------------------------------------------|
| Cu-Co PBA  | 6237.5   | 2549.7   | 2.3                             | -                                  | -                                                     |
| Catalyst 1 | 21802.5  | 271.5    | 74.5                            | 0.01546                            | 21.3575                                               |
| Catalyst 2 | 21798.7  | 272.7    | 74.1                            | 0.01554                            | 26.9158                                               |

## Water oxidation by $\text{Co}(\text{OH})_2/\text{CuO}$

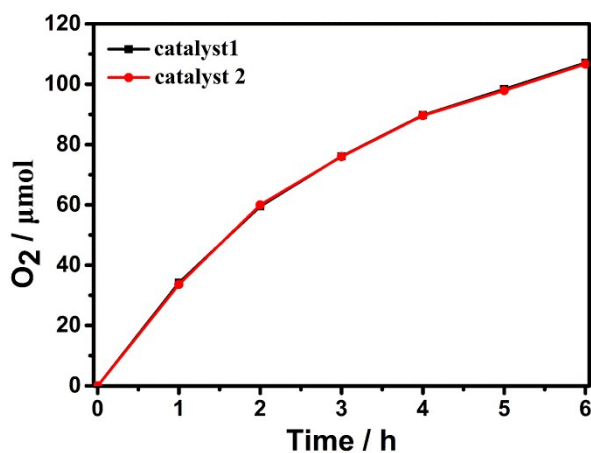

**Fig. S14** Kinetics of  $\text{O}_2$  evolution of the photocatalytic system using different catalysts. Reaction condition: NaOH solution: 0.10 M, 10 mL; catalyst: 2.05mg;  $\text{Na}_2\text{S}_2\text{O}_8$ : 40 mM; vigorous stirring at RT.

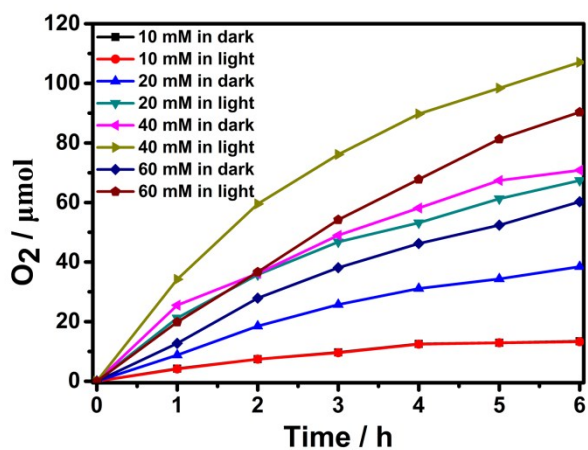

**Fig. S15** Kinetics of  $\text{O}_2$  evolution of the photocatalytic system using catalyst 1 with different concentration of  $\text{Na}_2\text{S}_2\text{O}_8$ . Reaction condition: NaOH solution: 0.10 M, 10 mL; Cu-Co PBA: 5 mg; vigorous stirring at RT.

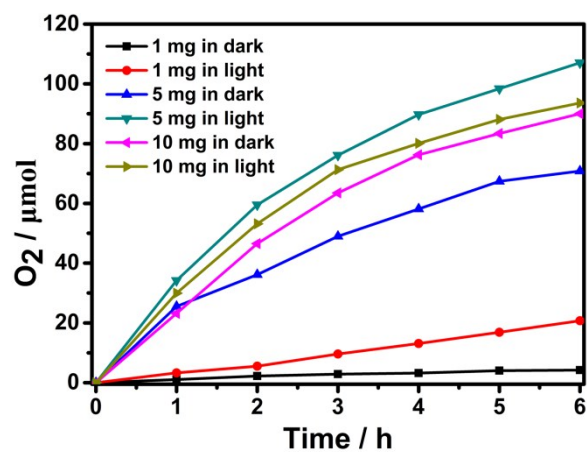

**Fig. S16** Kinetics of O<sub>2</sub> evolution of the photocatalytic system using different amount of catalyst  
 1. Reaction condition: NaOH solution: 0.10 M, 10 mL; Na<sub>2</sub>S<sub>2</sub>O<sub>8</sub>: 40 mM; vigorous stirring at RT.

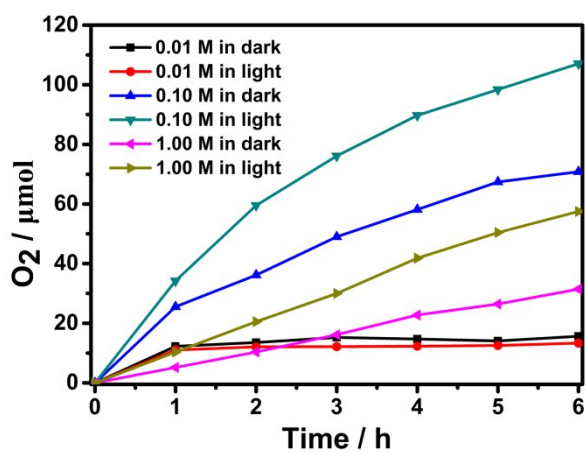

**Fig. S17** Kinetics of O<sub>2</sub> evolution of the photocatalytic system using different concentration of NaOH solution. Reaction condition: NaOH solution: 10 mL; Cu-Co PBA: 5 mg; Na<sub>2</sub>S<sub>2</sub>O<sub>8</sub>: 40 mM; vigorous stirring at RT.

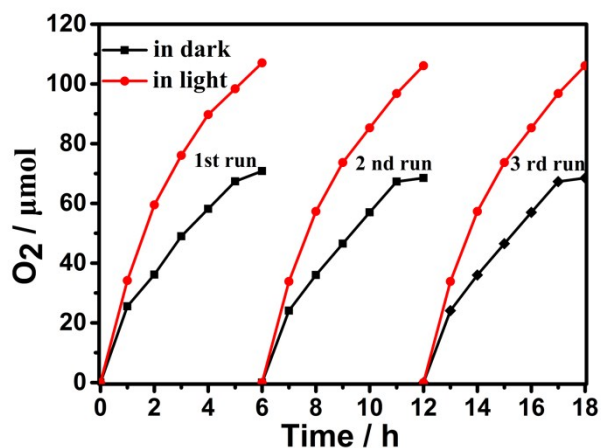

**Fig. S18** The reuse of catalyst 1 of water oxidation reaction. Reaction condition: NaOH solution: 0.10 M, 10 mL; Cu-Co PBA: 5 mg; Na<sub>2</sub>S<sub>2</sub>O<sub>8</sub>: 40 mM; vigorous stirring at RT.

## Calculation

According to the data of XRF, the average molecular weight of Co(OH)<sub>2</sub>/CuO was 79.4 g/mol.

$$AR \text{ (the photic area of reactor)} = d \cdot h = 2 \times 3.5 \text{ cm}^2 = 7.0 \text{ cm}^2$$

$$E = 52.8 \text{ mW} \cdot \text{cm}^{-2}$$

The number of incident photos (N)

$$N = \frac{E\lambda}{hc} = \frac{52.8 \times 10^{-3} \times 7 \times 3600 \times 6 \times 420 \times 10^{-9}}{6.626 \times 10^{-34} \times 3 \times 10^8} = 1.69 \times 10^{22}$$

Optimal reaction condition:

NaOH solution: 0.10 M; Cu-Co PBA: 5 mg; Na<sub>2</sub>S<sub>2</sub>O<sub>8</sub>: 40 mM.

The total TON:

$$\begin{aligned} \text{TON} &= \frac{\text{Number of reacted electrons}}{\text{Number of reacted electrons}} \\ &= \frac{4 \times 107.07 \times 10^{-6} \times 6.02 \times 10^{23}}{\left(2.05 \times 10^{-3} / 79.4\right) \times 6.02 \times 10^{23}} \\ &= 16.6 \end{aligned}$$

Deduction of the effect of chemocatalytic activities:



$$\text{TON} = \frac{\text{Number of reacted electrons}}{\text{Number of reacted electrons}}$$

$$= \frac{4 \times (107.07 - 70.84) \times 10^{-6} \times 6.02 \times 10^{23}}{\left(2.05 \times 10^{-3} / 79.4\right) \times 6.02 \times 10^{23}}$$

$$= 5.6$$

$$\text{QY \%} = \frac{4 \times \text{Number of evolved O}_2 \text{ molecules}}{\text{Number of incident photons}} \times 100$$

$$= \frac{4 \times (107.07 - 70.84) \times 10^{-6} \times 6.02 \times 10^{23}}{1.69 \times 10^{22}} \times 100$$

$$= 0.52\%$$

NaOH solution: 0.10 M; Cu-Co PBA: 5 mg; Na<sub>2</sub>S<sub>2</sub>O<sub>8</sub>: 20 mM.

The number of incident photos (N)

$$\lambda = 420 \text{ nm}$$

$$N = \frac{E\lambda}{hc} = \frac{52.8 \times 10^{-3} \times 7 \times 3600 \times 6 \times 420 \times 10^{-9}}{6.626 \times 10^{-34} \times 3 \times 10^8} = 1.69 \times 10^{22}$$

$$\text{QY \%} = \frac{4 \times \text{Number of evolved O}_2 \text{ molecules}}{\text{Number of incident photons}} \times 100\%$$

$$= \frac{4 \times (46.03 - 38.44) \times 10^{-6} \times 6.02 \times 10^{23}}{1.69 \times 10^{22}} \times 100\%$$

$$= 0.108\%$$

$$\lambda = 500 \text{ nm}$$

$$N = \frac{E\lambda}{hc} = \frac{52.8 \times 10^{-3} \times 7 \times 3600 \times 6 \times 500 \times 10^{-9}}{6.626 \times 10^{-34} \times 3 \times 10^8} = 2.01 \times 10^{22}$$

$$\text{QY \%} = \frac{4 \times \text{Number of evolved O}_2 \text{ molecules}}{\text{Number of incident photons}} \times 100\%$$

$$= \frac{4 \times (47.53 - 38.44) \times 10^{-6} \times 6.02 \times 10^{23}}{2.01 \times 10^{22}} \times 100\%$$

$$= 0.109\%$$

$$\lambda = 765 \text{ nm}$$

$$N = \frac{E\lambda}{hc} = \frac{52.8 \times 10^{-3} \times 7 \times 3600 \times 6 \times 765 \times 10^{-9}}{6.626 \times 10^{-34} \times 3 \times 10^8} = 3.08 \times 10^{22}$$

$$\begin{aligned} \text{QY \%} &= \frac{4 \times \text{Number of evolved O}_2 \text{ molecules}}{\text{Number of incident photons}} \times 100\% \\ &= \frac{4 \times (43.36 - 38.44) \times 10^{-6} \times 6.02 \times 10^{23}}{3.08 \times 10^{22}} \times 100\% \\ &= 0.038\% \end{aligned}$$

Photon flux ( $I_0$ )

$$\begin{aligned} I_0 = \frac{E\lambda}{hc} &= \frac{52.8 \times 10^{-3} \times 420 \times 10^{-9}}{6.626 \times 10^{-34} \times 3 \times 10^8} = 1.1156 \times 10^{17} \text{ mol} \cdot \text{s}^{-1} \cdot \text{cm}^{-2} \\ &= 4.016 \times 10^{20} \text{ mol} \cdot \text{h}^{-1} \cdot \text{cm}^{-2} \\ &= \frac{4.016 \times 10^{20}}{6.022 \times 10^{23}} \times 10^6 \mu\text{einstein} \cdot \text{h}^{-1} \\ &= 6.6689 \times 10^2 \mu\text{einstein} \cdot \text{h}^{-1} \end{aligned}$$

Deduction of the effect of chemocatalytic activities:

$$\text{rate} = \frac{46.03 - 38.44}{6} \mu\text{mol} \cdot \text{h}^{-1} = 1.265 \mu\text{mol} \cdot \text{h}^{-1}$$

$$\zeta_p = \frac{\text{rate}}{I_0} = \frac{1.265}{6.6689 \times 10^2} \times 100\% = 0.21\%$$

To prove the authenticity of the data, we used two different models of GC to obtain working curve using external standard and detect oxygen in the air. The air sample was 100  $\mu\text{L}$ . The basic parameters of the two GC are shown in Table S2. Table S3 was showed the working curve and peak area of oxygen from the two GC.

Table S2 Main parameters of gas chromatography.

| Instrument model  | Chromatographic column                 | Carrier gas | Carrier gas flow rate | Column temperature | Bridge current |
|-------------------|----------------------------------------|-------------|-----------------------|--------------------|----------------|
| Shimadzu GC-14B   | 5Å molecular sieve column (2 m × 4 mm) | Ar          | 20 mL/min             | 30 °C              | 85 mA          |
| Shimadzu GC-2014C | 5Å molecular sieve column (2 m × 4 mm) | Ar          | 20 mL/min             | 50 °C              | 70 mA          |

Table S3 oxygen detected by different two GC.

| Instrument model  | Working curve                                 | Peak area of O <sub>2</sub> | O <sub>2</sub> (μmol) |
|-------------------|-----------------------------------------------|-----------------------------|-----------------------|
| Shimadzu GC-14B   | Y=979.89X+529.18<br>(R <sup>2</sup> =0.9972)  | 110628.9                    | 113.36                |
| Shimadzu GC-2014C | Y=385.62X+2495.71<br>(R <sup>2</sup> =0.9961) | 46211.0                     | 112.36                |
